# Supplementary material
Source: Frontiers journal article supplement (https://www.frontiersin.org/articles/464382)
Supplement: Image_2.pdf [file Image_2.pdf]

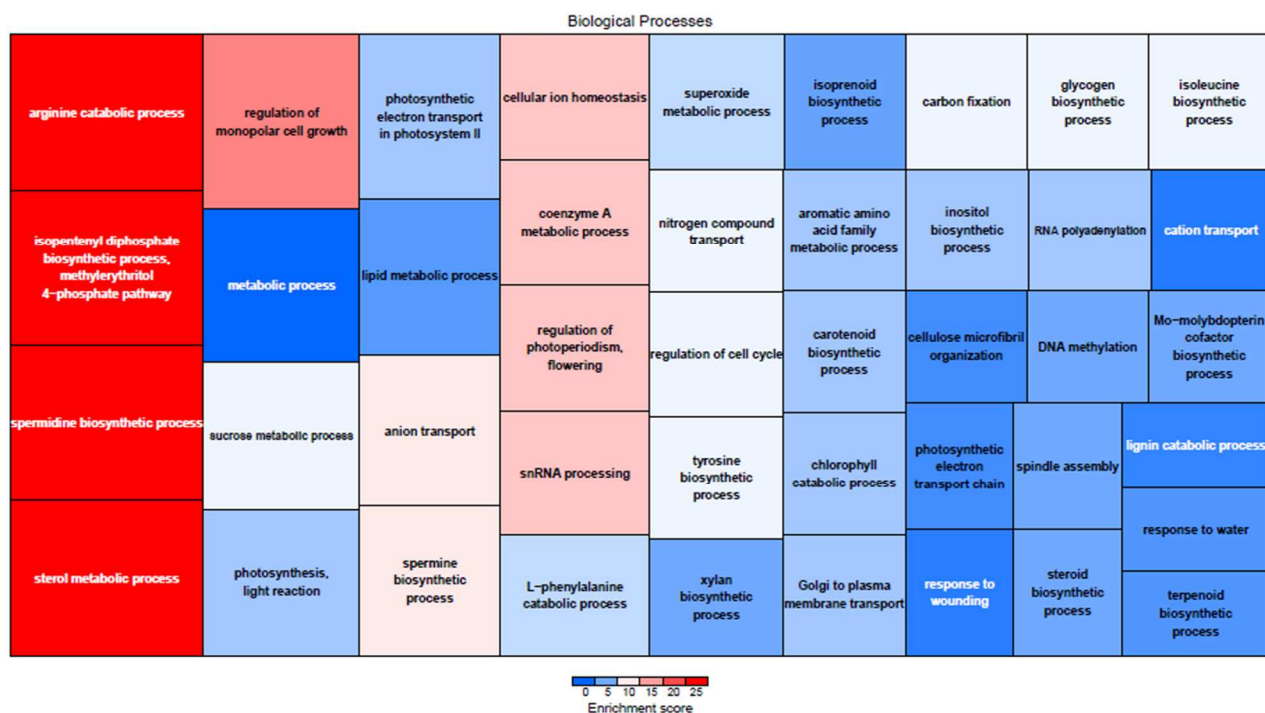

Supplementary Figure 2. Enriched GO categories of DEGs distribution based on the ontological domain 'Biological Process' for up-regulated genes. Colours indicate the enrichment score.
