# Supplementary material
Source: Frontiers journal article supplement (https://www.frontiersin.org/articles/464382)
Supplement: Image_4.pdf [file Image_4.pdf]

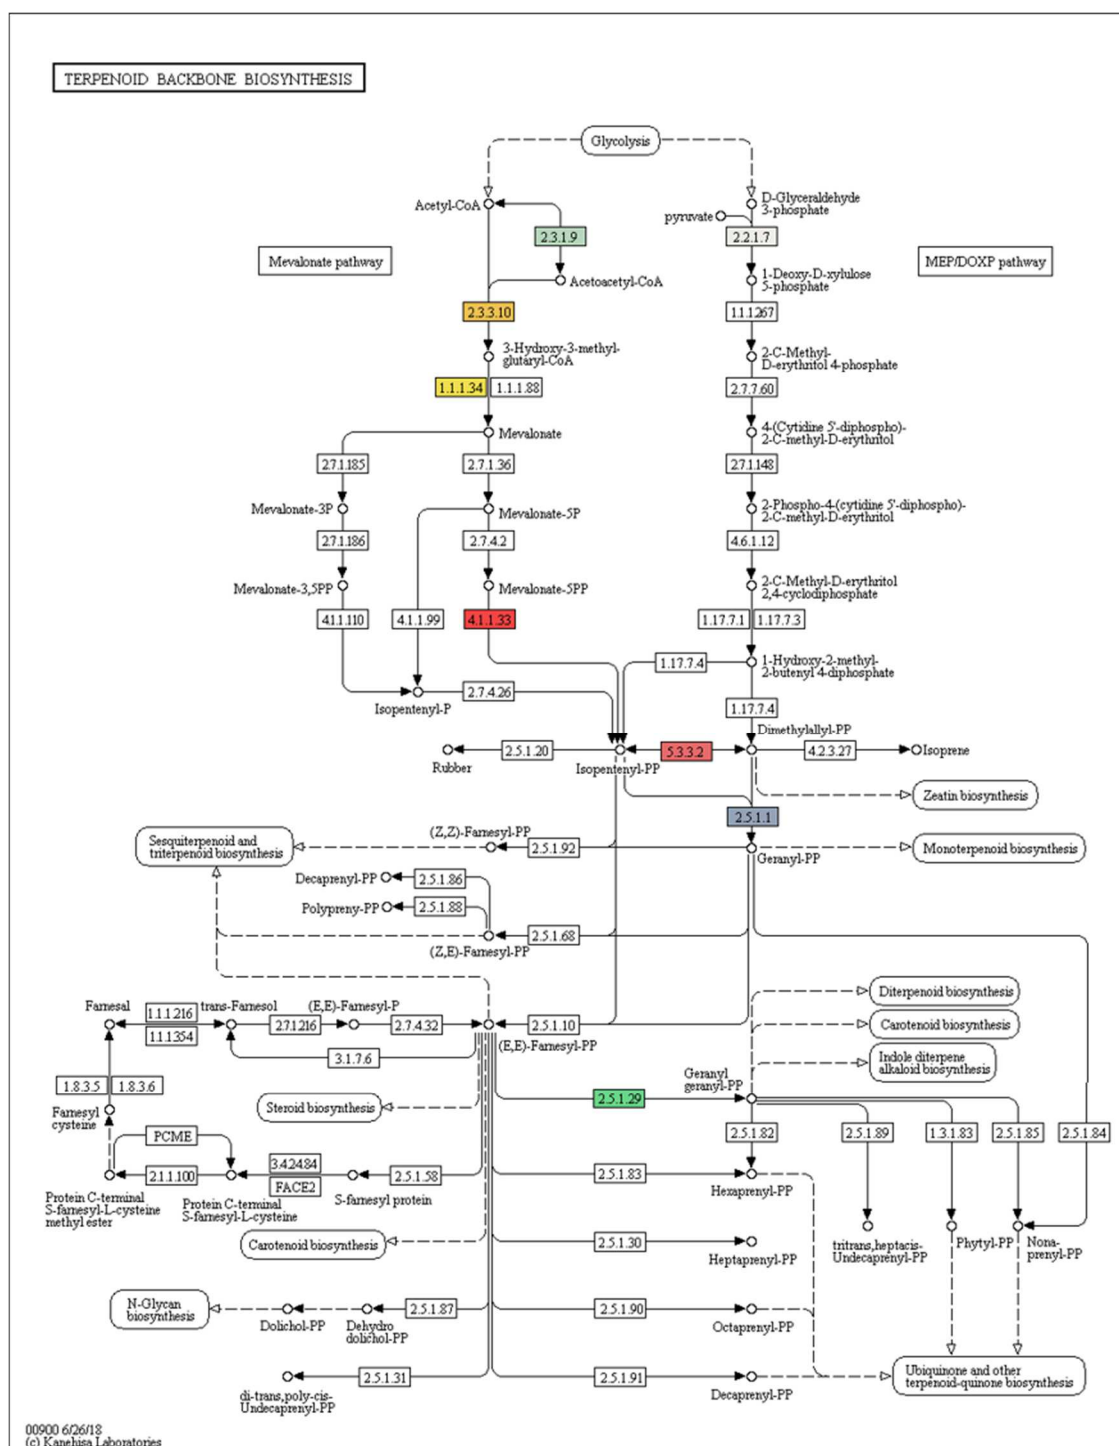

Supplementary Figure 4. Schematic diagram of the terpenoid biosynthesis pathway as determined by DEGs in plants treated with P1 and queried to a KEGG database. The enzymes evidenced in colour are encoded by genes found among up-regulated DEGs. A correspondence between enzymes and DEGs is shown in Table 2.
